# Supplementary material for: Elevated c-di-GMP Levels and Expression of the Type III Secretion System Promote Corneal Infection by Pseudomonas aeruginosa
Source: PubMed Central journal article supplement (PMC9387266; doi:10.1128/iai.00061-22), 2022-08-01
Supplement: iai.00061-22-s0001.pdf [file iai.00061-22-s0001.pdf]

**Elevated cyclic-di-GMP levels and expression of the type III secretion system  
promote corneal infection by *Pseudomonas aeruginosa***

Joey Kuok Hoong Yam <sup>1</sup>Y, Thet Tun Aung <sup>2,3</sup>Y, Song Lin Chua <sup>4</sup>, Yingying Cheng <sup>5</sup>, Gurjeet Singh Kohli <sup>6</sup>, Jianuan Zhou <sup>7</sup>, Florentin Constancias <sup>8</sup>, Yang Liu <sup>9</sup>, Zhao Cai <sup>9</sup>, May Margarete Santillan Salido <sup>1</sup>, Daniela I. Drautz-Moses <sup>1</sup>, Scott A. Rice <sup>1,10,11</sup>, Stephan Christoph Schuster <sup>1,10</sup>, Zhao Zhi Boo <sup>10</sup>, Bin Wu <sup>10</sup>, Staffan Kjelleberg <sup>1,10,12</sup>, Tim Tolker-Nielsen <sup>13</sup>, Rajamani Lakshminarayanan <sup>2,14,15</sup>, Roger W. Beuerman <sup>2,16,17,18</sup>, Liang Yang <sup>9\*</sup>, Michael Givskov <sup>1,13\*</sup>

**Table S1.** Strains and primers used in this study.

| Strains and primers                                | Relevant characteristic(s)                                                                               | Source or reference |
|----------------------------------------------------|----------------------------------------------------------------------------------------------------------|---------------------|
| Strains                                            |                                                                                                          |                     |
| PAO1                                               | Prototypic wild-type strain                                                                              | 1                   |
| $\Delta wspF$                                      | <i>wspF</i> derivative of PAO1 constructed by allelic exchange                                           | 2                   |
| $\Delta siaD$                                      | <i>siaD</i> derivative of PAO1 constructed by allelic exchange                                           | 3                   |
| $\Delta PA5442$                                    | <i>PA5442</i> derivative of PAO1 constructed by allelic exchange                                         | This study          |
| $\Delta wspF\Delta pscJ$                           | <i>pscJ</i> derivative of $\Delta wspF$ constructed by allelic exchange                                  | This study          |
| $\Delta wspF\Delta pscJ$ COM                       | $\Delta wspF\Delta pscJ$ mutant complemented by wild-type <i>pscJ</i> gene via the miniCTX2- <i>pscJ</i> | This study          |
| PAO1/ <i>p<sub>lac</sub>-yhjH</i>                  | Tc <sup>r</sup> ; PAO1 containing the <i>p<sub>lac</sub>-yhjH</i> vector                                 | 4                   |
| PAO1/ <i>p<sub>cdrA</sub>-gfp</i>                  | Gm <sup>r</sup> ; PAO1 carrying the <i>p<sub>cdrA</sub>-gfp</i> report                                   | 5                   |
| PAO1-miniTn7- <i>p<sub>lac</sub>-gfp</i>           | Gm <sup>r</sup> ; PAO1 tagged by the miniTn7- <i>gfp</i>                                                 | 4                   |
| $\Delta wspF$ -miniTn7- <i>p<sub>lac</sub>-gfp</i> | Gm <sup>r</sup> ; $\Delta wspF$ tagged by the miniTn7- <i>gfp</i>                                        | 4                   |

|                                                                            |                                                                                                 |   |
|----------------------------------------------------------------------------|-------------------------------------------------------------------------------------------------|---|
| PAO1/ <i>p<sub>lac</sub>-yhjH</i> -<br>miniTn7- <i>p<sub>lac</sub>-gfp</i> | Gm <sup>r</sup> ; Tc <sup>r</sup> ; PAO1/ <i>p<sub>lac</sub>-yhjH</i> tagged by the miniTn7-gfp | 4 |
| PAO1/ <i>p<sub>exoT</sub>-gfp</i>                                          | Gm <sup>r</sup> ; PAO1 carrying the miniTn7- <i>exoT-gfp</i> report                             | 6 |
| Primers for constructing the deletion mutant                               |                                                                                                 |   |
| PA5442-1                                                                   | agctcggtagccgggTGAAGTCTGGATGTTCTCG                                                              |   |
| PA5442-2                                                                   | TTCAACGAGCCTGGCGCAAAGTCATAGGCGCTTGTCTTG                                                         |   |
| PA5442-3                                                                   | CAAGAACAAGCGCCTATGACTTTGCGCCAGGCTCGTTGAA                                                        |   |
| PA5442-4                                                                   | cgacggccagtgccATCTTTTCCGGTAGCGCTTC                                                              |   |
| PA5442-F                                                                   | AACGGTAGTTCTGCTCCAG                                                                             |   |
| PA5442-R                                                                   | CTCGCCCTCGAAGAATTGC                                                                             |   |
| pscJ-1                                                                     | agctcggtagccgggACATCAACTCGACGGTGACC                                                             |   |
| pscJ-2                                                                     | AGAAGAAGTGCAGGTTGACAGACCTTTCACCGTTTCGC                                                          |   |
| pscJ-3                                                                     | GCGAACGGTGAAAGGTCTGTCAACCTGGCGCAGTTCTTCT                                                        |   |
| pscJ-4                                                                     | cgacggccagtgccGCATTCATCGCTCGCTTGTC                                                              |   |
| pscJ-F                                                                     | CCGAGCTGCAACACAAGATC                                                                            |   |
| pscJ-R                                                                     | GCGACTGGCGTCTAGTTCAA                                                                            |   |
| pscJCOM-F                                                                  | CGGGATCCCGAGATCAGGGAGCGTTTCAGC                                                                  |   |
| pscJCOM-R                                                                  | GGAATTCCCGCAGTCCAATTCCAGTTGC                                                                    |   |
| Primers for qRT-PCR analysis                                               |                                                                                                 |   |
| pelA-F                                                                     | GACAACTGGATCGCTGCACG                                                                            |   |
| pelA-R                                                                     | CTTGAGTTTCTGCGACAGCC                                                                            |   |
| cupA1-F                                                                    | TATCACATTCAGCGGCGAAG                                                                            |   |
| cupA1-R                                                                    | TCGGTGAGTTGCAGGGTGAAG                                                                           |   |
| dipA-F                                                                     | AAGAACCACGAGCCTTACTG                                                                            |   |
| dipA-R                                                                     | CCAGCTTGTTCTGCGTGATG                                                                            |   |
| nbdA-F                                                                     | CGGCATTCAACGAAGTGTTTC                                                                           |   |
| nbdA-R                                                                     | TCGTTGATCCGCTTGAAGTG                                                                            |   |
| PA0575-F                                                                   | CCGAGTACGCCATCCACTAC                                                                            |   |

|          |                       |
|----------|-----------------------|
| PA0575-R | TGATCGGGGTGACCAAATCG  |
| PA1181-F | TCAACAGCGACATCACCG    |
| PA1181-R | CCGATGGAATACAGGGTCAC  |
| PA2072-F | GGCATTTCGTCTTCACCTATC |
| PA2072-R | CCTTCCAGCCACTTGACGAT  |
| mucR-F   | TCAGCCAGCCGTACCAGATA  |
| mucR-R   | CTGGTCCTTGGCGTGATACA  |
| GAPDH-F  | GACCGTTCCTCGACAAGTTC  |
| GAPDH-R  | TCAGCAGGCCTTCGAGATAG  |
| proC-F   | ATCAGTTGCTCCGGCTTCAG  |
| proC-R   | ATCGACGTGGTCGAGTCCAA  |
| rpoD-F   | GGGGCTGTCTCGAATACGTT  |
| rpoD-R   | GGGATACCTGACTTACGCGG  |

**Table S2.** Mapping statistics of the RNA sequencing raw reads of 2 dpi

|                                                                    | PAO1_2dpi_R1        | PAO1_2dpi_R2        | PAO1_2dpi_R3        | $\Delta wspF$ _2dpi_R1 | $\Delta wspF$ _2dpi_R2 | $\Delta wspF$ _2dpi_R3 | yhjH_2dpi_R1        | yhjH_2dpi_R2        | yhjH_2dpi_R3        |
|--------------------------------------------------------------------|---------------------|---------------------|---------------------|------------------------|------------------------|------------------------|---------------------|---------------------|---------------------|
| <b>Total reads obtained</b>                                        | 40,035,814          | 42,736,300          | 45,704,980          | 38,877,460             | 43,753,686             | 44,780,662             | 44,881,008          | 44,024,644          | 39,339,728          |
| <b>Total reads after trimming</b>                                  | 38,346,440          | 40,895,410          | 44,112,144          | 37,145,526             | 41,698,876             | 42,801,172             | 43,227,742          | 42,296,266          | 37,700,828          |
| <b>Total reads mapped in pairs to <i>P. aeruginosa</i></b>         | 1,175,098           | 716,482             | 547,026             | 1,192,838              | 1,092,994              | 1,018,384              | 1,088,030           | 631,282             | 404,204             |
| <b>Total reads mapped in pairs to <i>P. aeruginosa</i> (%)</b>     | 3.06                | 1.75                | 1.24                | 3.21                   | 2.62                   | 2.38                   | 2.52                | 1.49                | 1.07                |
| <b>Total fragments mapped to <i>P. aeruginosa</i></b>              | 587,549             | 358,241             | 273,398             | 596,419                | 546,497                | 509,192                | 544,015             | 315,641             | 201,774             |
| <b>Fragments mapped to <i>P. aeruginosa</i> coding genes</b>       | 513,777<br>(87.44%) | 312,588<br>(87.26%) | 236,872<br>(86.60%) | 516,942<br>(86.67%)    | 472,474<br>(86.46%)    | 448,172<br>(88.02%)    | 474,418<br>(87.21%) | 276,644<br>(87.65%) | 177,663<br>(87.91%) |
| <b>Fragments mapped to <i>P. aeruginosa</i> intergenic regions</b> | 73,772<br>(12.56%)  | 45,653<br>(12.74%)  | 36,641<br>(13.40%)  | 79,477<br>(13.33%)     | 74,023<br>(13.54%)     | 61,020<br>(11.98%)     | 69,597<br>(12.79%)  | 38,997<br>(12.35%)  | 24,439<br>(12.09%)  |
| <b>Total reads mapped in pairs to mouse</b>                        | 26,460,142          | 29,463,476          | 31,741,164          | 25,457,626             | 28,428,862             | 29,433,704             | 30,113,868          | 30,435,404          | 26,269,540          |
| <b>Total reads mapped in pairs to mouse (%)</b>                    | 69.00               | 72.05               | 71.96               | 68.53                  | 68.18                  | 68.77                  | 69.66               | 71.96               | 69.68               |

**Table S3.** Mapping statistics of the RNA sequencing raw reads of 7 dpi

|                                                                    | PAO1_7dpi_R1       | PAO1_7dpi_R2       | PAO1_7dpi_R3       | $\Delta wspF$ _7dpi_R1 | $\Delta wspF$ _7dpi_R2 | $\Delta wspF$ _7dpi_R3 | yhjH_7dpi_R1      | yhjH_7dpi_R2       | yhjH_7dpi_R3       |
|--------------------------------------------------------------------|--------------------|--------------------|--------------------|------------------------|------------------------|------------------------|-------------------|--------------------|--------------------|
| <b>Total reads obtained</b>                                        | 36,342,580         | 33,049,080         | 40,675,146         | 41,007,268             | 42,895,076             | 42,955,498             | 40,264,878        | 41,793,392         | 37,251,962         |
| <b>Total reads after trimming</b>                                  | 35,621,656         | 32,490,358         | 39,353,788         | 39,629,118             | 41,411,038             | 41,401,708             | 39,009,538        | 40,425,854         | 36,351,936         |
| <b>Total reads mapped in pairs to <i>P. aeruginosa</i></b>         | 107,380            | 36,888             | 63,184             | 6,066                  | 7,444                  | 3,238                  | 21,574            | 39,896             | 81,036             |
| <b>Total reads mapped in pairs to <i>P. aeruginosa</i> (%)</b>     | 0.30               | 0.11               | 0.16               | 0.02                   | 0.02                   | 0.01                   | 0.06              | 0.10               | 0.22               |
| <b>Total fragments mapped to <i>P. aeruginosa</i></b>              | 53,690             | 18,444             | 31,592             | 3,033                  | 3,722                  | 1,619                  | 10,787            | 19,948             | 40,518             |
| <b>Fragments mapped to <i>P. aeruginosa</i> coding genes</b>       | 45,974<br>(85.63%) | 16,268<br>(88.20%) | 26,903<br>(85.16%) | 2,635<br>(86.88%)      | 3,151<br>(84.66%)      | 1,384<br>(85.48%)      | 9,302<br>(86.23%) | 17,160<br>(86.02%) | 34,931<br>(86.21%) |
| <b>Fragments mapped to <i>P. aeruginosa</i> intergenic regions</b> | 7,716<br>(14.37%)  | 2,172<br>(11.80%)  | 4,689<br>(14.84%)  | 398<br>(13.12%)        | 571<br>(15.34%)        | 235<br>(14.52%)        | 1,485<br>(13.77%) | 2,788<br>(13.98%)  | 5,587<br>(13.79%)  |
| <b>Total reads mapped in pairs to mouse</b>                        | 28,087,174         | 25,627,294         | 30,082,942         | 31,136,034             | 31,910,616             | 32,332,158             | 30,199,178        | 31,233,596         | 28,989,592         |
| <b>Total reads mapped in pairs to mouse (%)</b>                    | 78.85              | 78.88              | 76.44              | 78.57                  | 77.06                  | 78.09                  | 77.41             | 77.26              | 79.75              |

**Table S4.** Statistics of differentially expressed bacterial genes for each transcriptomic comparison group

| Comparison                                                                                           | Differentially expressed genes |                 |                            |                         | Total |
|------------------------------------------------------------------------------------------------------|--------------------------------|-----------------|----------------------------|-------------------------|-------|
|                                                                                                      | Up-regulation                  | Down-regulation | Between 2 to 4-fold change | More than 4-fold change |       |
| <i>in vivo</i> PAO1 vs <i>in vitro</i> planktonic cells                                              | 979                            | 1082            | 1072                       | 989                     | 2061  |
| <i>in vitro</i> biofilm cells vs <i>in vitro</i> planktonic cells                                    | 1004                           | 1014            | 1261                       | 757                     | 2018  |
| <i>in vivo</i> $\Delta$ <i>wspF</i> vs <i>in vivo</i> <i>p<sub>lac</sub>-yhjH</i> -containing strain | 46                             | 87              | 112                        | 21                      | 133   |
| <i>in vivo</i> PAO1 vs <i>in vivo</i> <i>p<sub>lac</sub>-yhjH</i> -containing strain                 | 49                             | 79              | 112                        | 16                      | 128   |
| <i>in vivo</i> PAO1 vs <i>in vitro</i> biofilm cells                                                 | 900                            | 897             | 977                        | 820                     | 1797  |

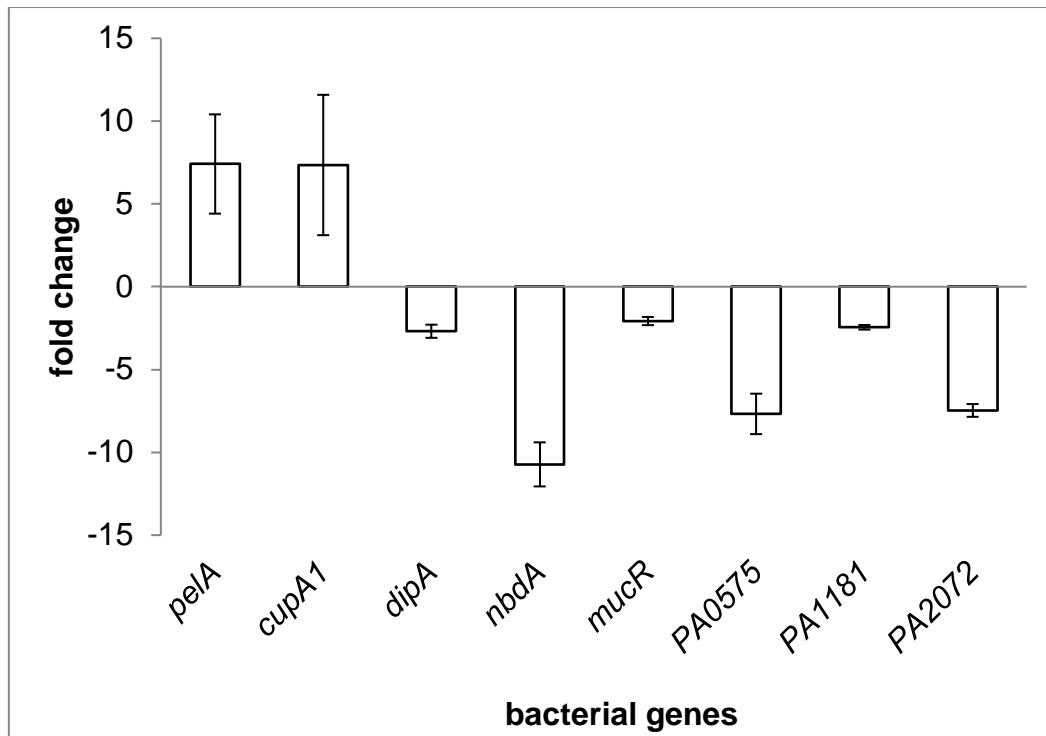

**Figure S1. qRT-PCR analysis.** Expression of *pelA*, *cupA1*, *dipA*, *mucR*, *nbdA*, *PA0575*, *PA1181*, *PA2072* messenger RNA in 2 dpi *in vivo* PAO1 compared with *in vitro* planktonic cells. Means and s.d. from triplicate experiments are shown. \* $p < 0.01$ .

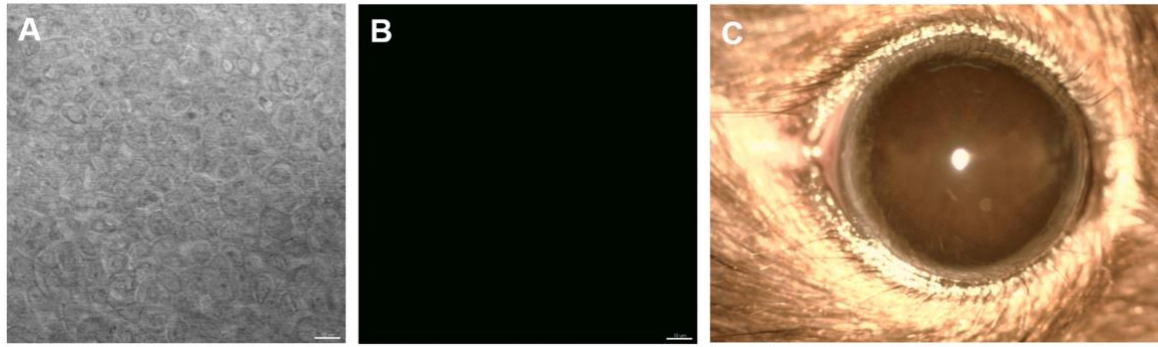

**Figure S2. Images of control uninfected mouse corneas.** The uninfected mouse corneas were viewed under bright field (A), CLSM (green fluorescence channel) (B) and slit lamp microscopy (C). Experiments were performed in triplicate, and a representative image for each condition is shown. Scale bars, 10  $\mu\text{m}$ .



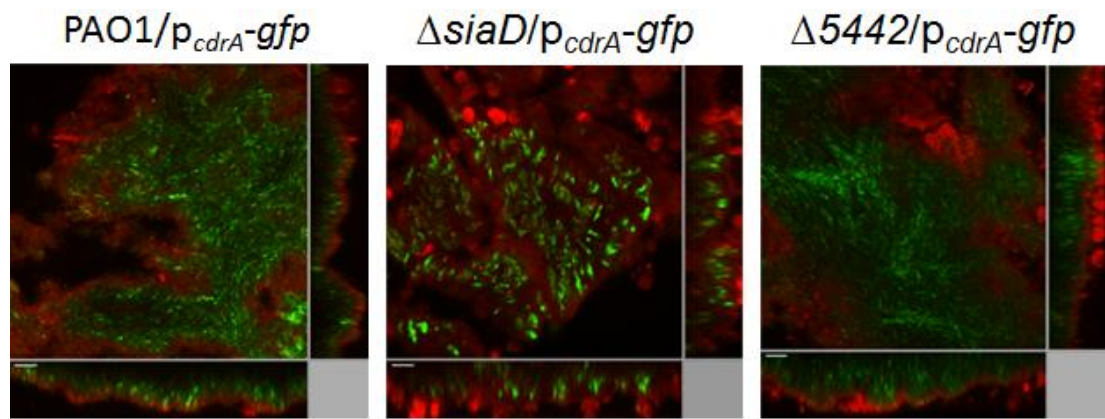

**Figure S3. p<sub>cdrA</sub>-gfp expression in different *P. aeruginosa* DGC mutants (derived from PAO1 wild type) during 2 dpi ocular infections.** Experiments were performed in triplicate, and a representative image for each condition is shown. Green and red fluorescence refer to the expression of p<sub>cdrA</sub>-gfp expression and SYTO<sup>®</sup>62 stain respectively. Scale bars, 20 μm.

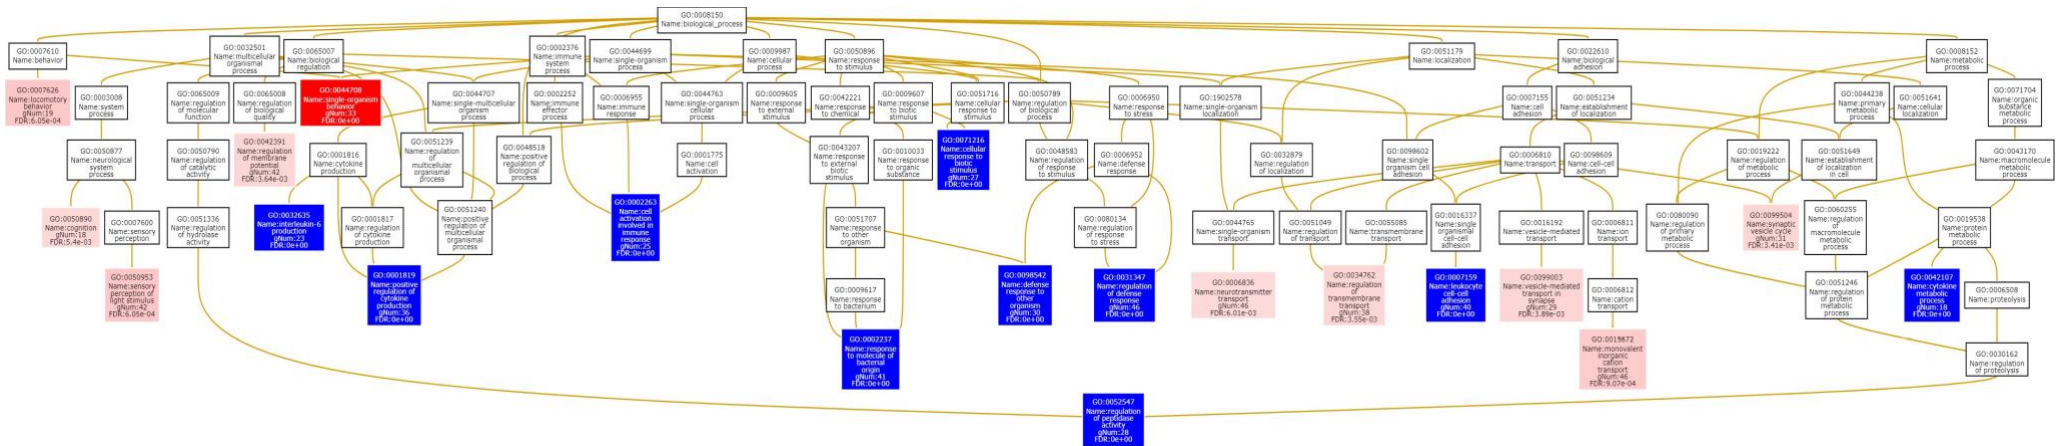

**Figure S4. Biological process enrichment of mouse transcriptome using WEB-based GENE SeT ANALYSIS TOOLKIT (WebGestalt) by comparing 7 dpi to 2 dpi  $\Delta wspF$ -infected corneal cells RNA-seq data from supplementary data 6.** The grouping and classification of each biological process was processed by WebGestalt. The groups highlighted in pink or red indicate the weak or strong upregulation of gene expression in 7 dpi comparing to 2 dpi respectively. The groups highlighted in light blue or dark blue refers to weak or strong downregulation of gene expression in 7 dpi than 2 dpi respectively.

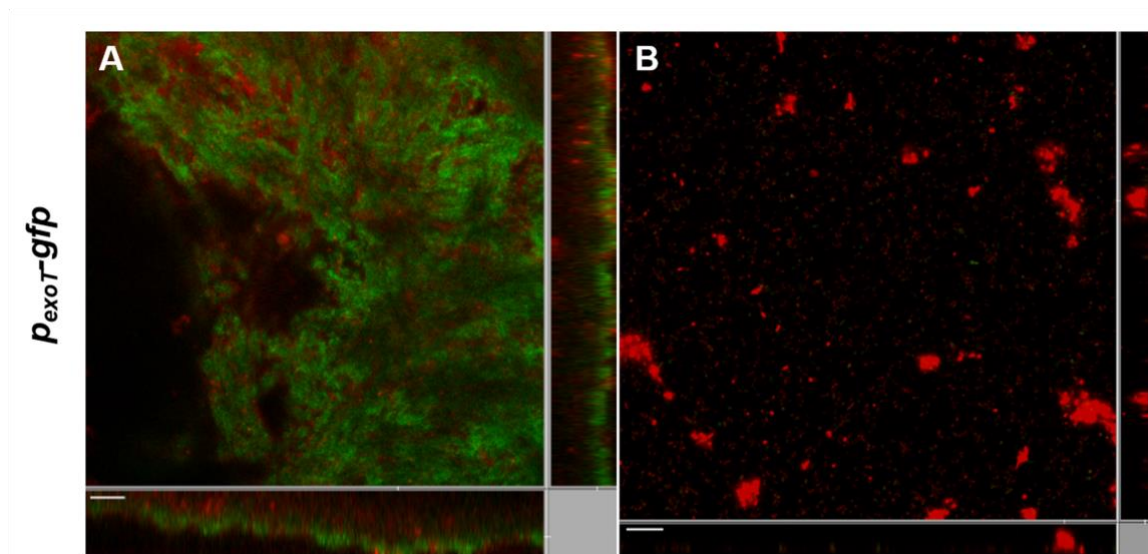

**Figure S5. Confocal images of *P. aeruginosa* the T3SS reporter strain,  $p_{\text{exoT-gfp}}$ , after cultivation *in vivo* and *in vitro* for 2 days.** A) Mouse cornea after 2 days infection with the  $p_{\text{exoT-gfp}}$  strain. B) 2 days old *in vitro* static biofilm formed by the  $p_{\text{exoT-gfp}}$  strain. Green and red fluorescence represents the expression of  $p_{\text{exoT-gfp}}$  and staining by SYTO<sup>®</sup>62. Experiments were carried out in triplicates and a representative image is shown for each condition. Scale bars, 20  $\mu\text{m}$ .

**Supplementary data 1.** Regulated genes in 2 dpi *in vivo* PAO1 compared to *in vitro* planktonic cells.

**Supplementary data 2.** Regulated genes in *in vitro* biofilm cells compared to *in vitro* planktonic cells.

**Supplementary data 3.** Shared regulated genes between 2 dpi *in vivo* PAO1 and *in vitro biofilm* cells when compared to *in vitro* planktonic cells.

**Supplementary data 4.** Regulated genes in 2 dpi *in vivo*  $\Delta wspF$  compared to 2 dpi *in vivo* *p<sub>lac</sub>-yhjH*-containing strain.

**Supplementary data 5.** Regulated genes 2 dpi *in vivo* PAO1 compared to 2 dpi *in vivo* *p<sub>lac</sub>-yhjH*-containing strain

**Supplementary data 6.** Regulated genes in 7 dpi corneal cells compared to 2 dpi corneal cells after infected by  $\Delta wspF$  strain.

**Supplementary data 7.** Regulated genes in 2 dpi *in vivo* PAO1 compared to *in vitro* biofilm cells.

## References

1. Holloway, B.W. & Morgan, A.F. Genome organization in *Pseudomonas*. *Annu Rev Microbiol* **40**, 79-105 (1986).
2. Rybtke, M.T. *et al.* Fluorescence-based reporter for gauging cyclic di-GMP levels in *Pseudomonas aeruginosa*. *Appl Environ Microbiol* **78**, 5060-5069 (2012).
3. Chua, S.L. *et al.* C-di-GMP regulates *Pseudomonas aeruginosa* stress response to tellurite during both planktonic and biofilm modes of growth. *Scientific reports* **5**, 10052 (2015).
4. Chua, S.L. *et al.* Bis-(3'-5')-cyclic dimeric GMP regulates antimicrobial peptide resistance in *Pseudomonas aeruginosa*. *Antimicrob Agents Chemother* **57**, 2066-2075 (2013).
5. Wolcott, R.D. & Ehrlich, G.D. Biofilms and chronic infections. *JAMA* **299**, 2682-2684 (2008).
6. Almblad, H. *et al.* The Cyclic AMP-Vfr Signaling Pathway in *Pseudomonas aeruginosa* Is Inhibited by Cyclic Di-GMP. *J Bacteriol* **197**, 2190-2200 (2015).
